# Supplementary material for: A Retroviral Replicating Vector Encoding Cytosine Deaminase and 5-FC Induces Immune Memory in Metastatic Colorectal Cancer Models
Source: PubMed Central journal article supplement — Mol Ther Oncolytics. 2017 Dec 5;8:14–26. doi: 10.1016/j.omto.2017.12.001 (PMC5751967; doi:10.1016/j.omto.2017.12.001), 2017-12-05
Supplement: mmc1.pdf [file mmc1.pdf]

**OMTO, Volume 8**

**Supplemental Information**

**A Retroviral Replicating Vector Encoding**

**Cytosine Deaminase and 5-FC Induces Immune**

**Memory in Metastatic Colorectal Cancer Models**

**Kader Yagiz, Maria E. Rodriguez-Aguirre, Fernando Lopez Espinoza, Tiffany T. Montellano, Daniel Mendoza, Leah A. Mitchell, Carlos E. Ibanez, Noriyuki Kasahara, Harry E. Gruber, Douglas J. Jolly, and Joan M. Robbins**

# SUPPLEMENTARY FIGURES AND LEGENDS:

## Figure S1

**A**

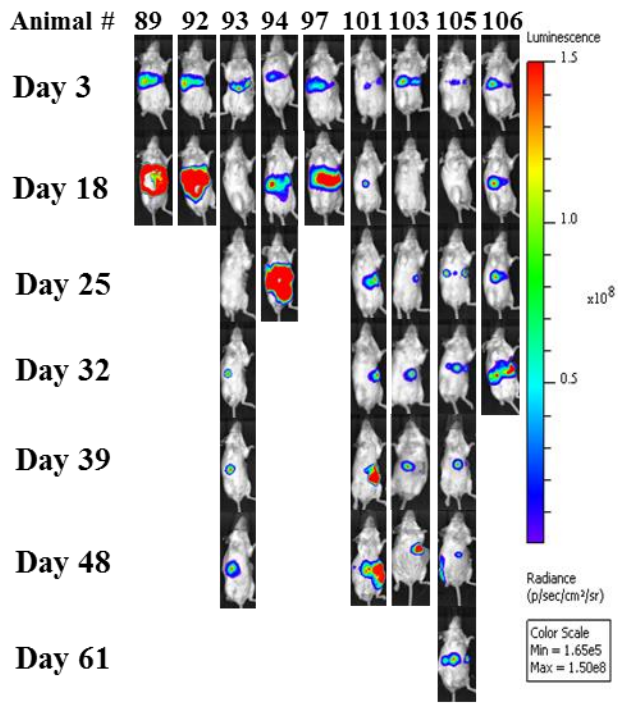

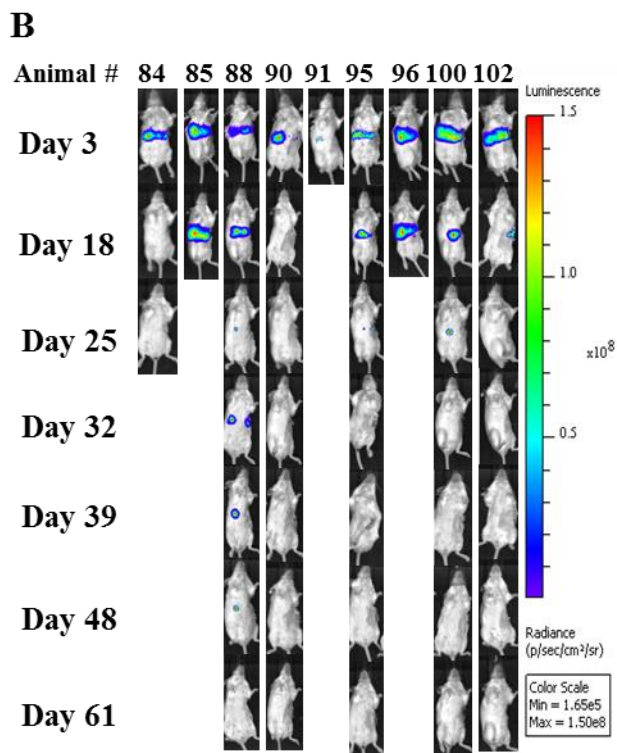

**Figure S1: Tumor progression in the Toca 511 and 5-FC treatment group was blunted over time**

Representative radiance intensities (photon/sec/mouse) from **Fig. 1**. (A) PBS and (B) 5-FC treatment group at various time points throughout the study. After liver metastases were established with Toca 511 pre-transduced CT26-Luc cells delivered intrasplenically, each mouse was imaged by IVIS at indicated time points. 5-FC treatment (500 mg/kg, IP, BID) was initiated on day 13 for 5 days on and 2 days off for total of six cycles. Control group received PBS.

Figure S2

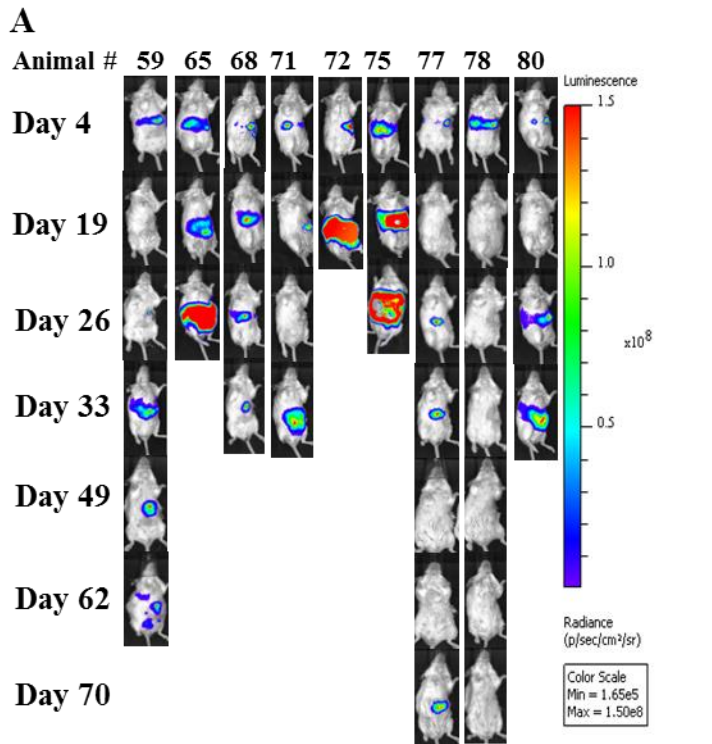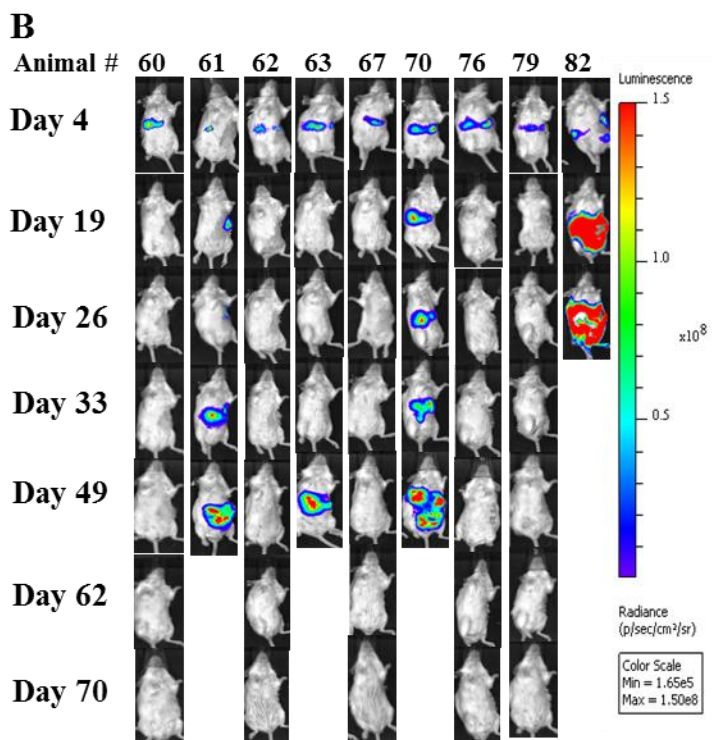

**Figure S2: Tumor progression after IV Toca 511 administration and cycles of 5-FC treatment group**

Representative radiance intensities (photon/sec/mouse) from Fig. 3. (A) PBS and (B) 5-FC treatment group at various time points throughout the study. Mice inoculated with CT26-Luc cells intrasplenically were then administered Toca 511 IV for 5 consecutive days starting on day 4 post cell inoculation. Each mouse was imaged by IVIS at indicated time points. 5-FC treatment (500 mg/kg, IP, BID) was initiated on day 13 for 5 days on and 2 days off for a total of six cycles. Control group received PBS.

**Figure S3**

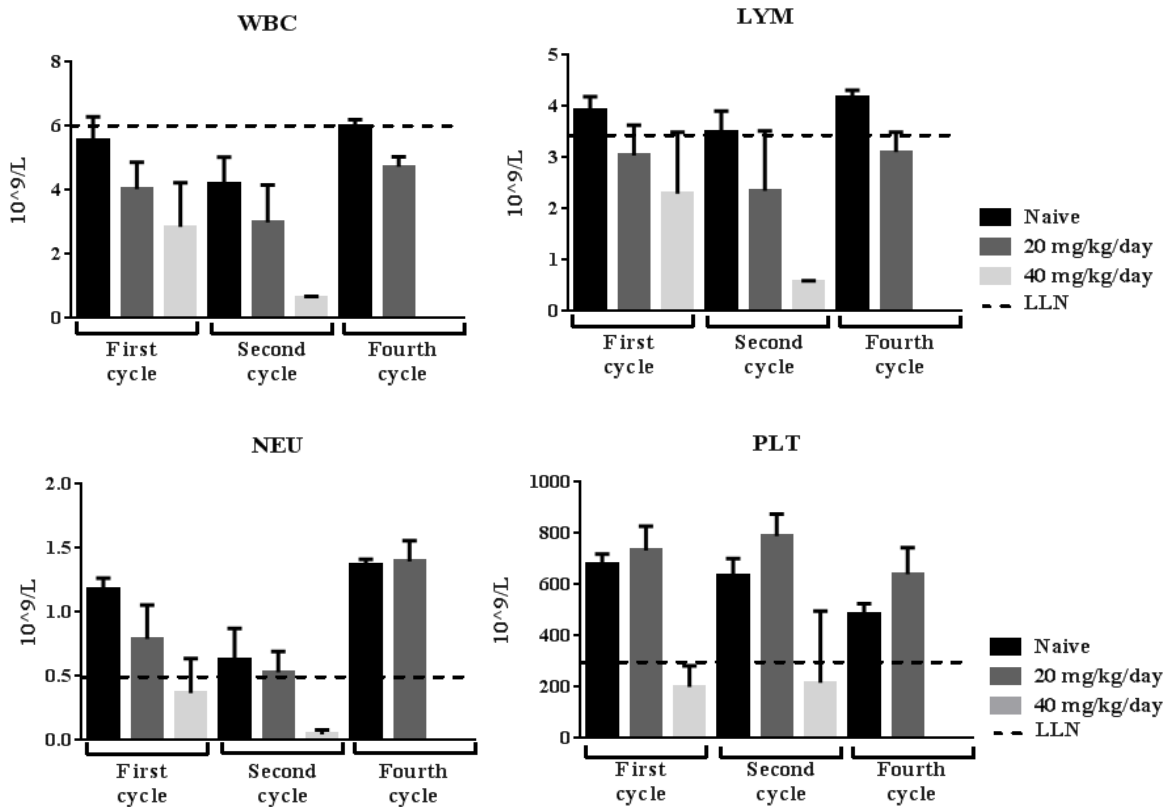

**Figure S3: Hematological toxicity of systemic 5-FU treatment in non-tumor bearing animals** A group of non-tumor bearing BALB/c mice received 20 mg/kg/day or 40 mg/kg/day 5-

FU injections. Cycles were 5 days on and 2 days off for a total of four cycles. WBC, LYM, NEU and PLT were determined at indicated time points. Dotted line represents LLN for age-matched mice. Age-matched mouse LLN = WBC:  $6 \times 10^9$  cells/L; LYM:  $3.4 \times 10^9$  cells/L; PLT:  $200 \times 10^9$  cells/L; NEU:  $0.5 \times 10^9$  cells/L.

**Figure S4**

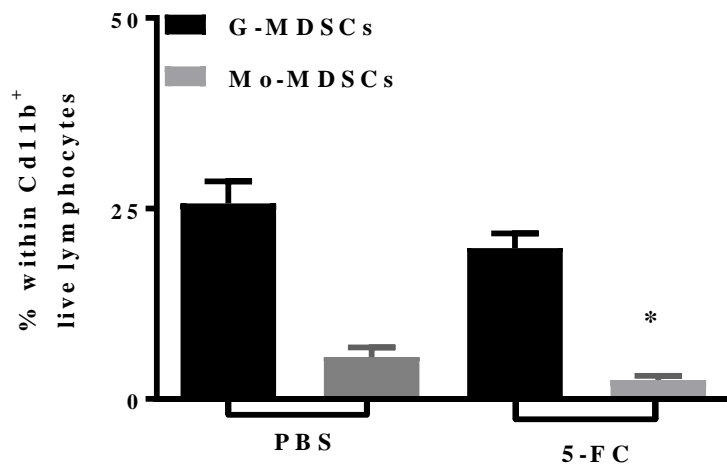

**Figure S4: Distribution of monocytic and granulocytic myeloid derived suppressor cells in a brain metastasis model of mCRC BALB/c mice received Toca 511 pre-transduced CT26 cells intracranially and were treated with 5-FC (500 mg/kg, IP, BID) or PBS. Treatments started at day 10 post cell inoculation and were for 7 days on and 7 days off for one cycle. Tumor was collected for flow cytometric analysis 14 days post cell implantation. CD11b<sup>+</sup> live lymphocytes were stained for Ly6G and Ly6C. Monocytic (CD11b<sup>+</sup>Ly6C<sup>+</sup>) and granulocytic (CD11b<sup>+</sup>Ly6G<sup>+</sup>) myeloid cells determined. Data are depicted as mean +/- SEM. \*Statistical significance was defined as  $P < .05$ . (\* $p < 0.0001$  vs. PBS).**

**Figure S5**

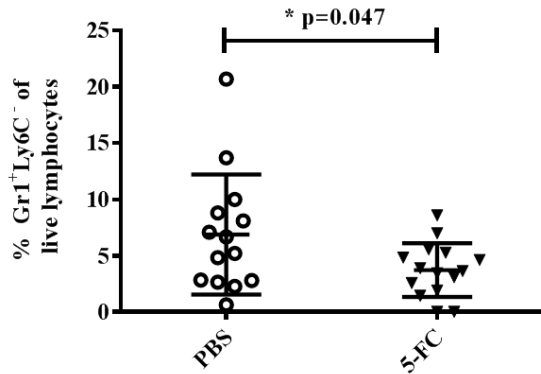

**Figure S5: Neutrophils after one cycle of 5-FC treatment in a brain metastasis model of mCRC** BALB/c mice received Toca 511 pre-transduced CT26 cells intracranially and were treated with 5-FC (500 mg/kg, IP, BID) or PBS. Treatments started at day 10 post cell inoculation and were for 7 days on and 7 days off for one cycle. Tumor was collected for flow cytometric analysis 14 days post cell implantation. Neutrophils (Gr1<sup>+</sup>Ly6C<sup>-</sup>) were analyzed as a percentage of total live lymphocytes in the tumor. \*Statistical significance was defined as  $P < .05$ .

**Figure S6**

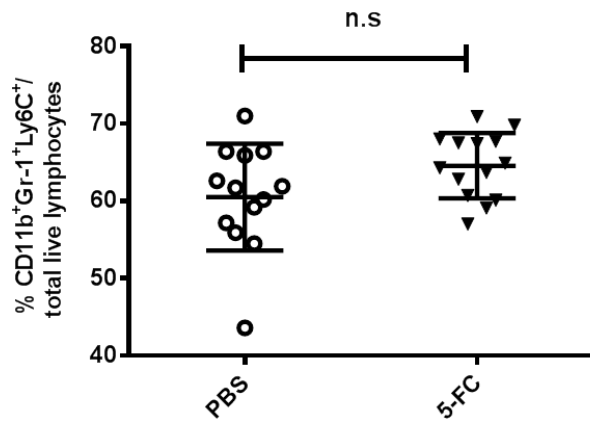

**Figure S6: Myeloid cell populations in bone marrow of tumor-bearing animals after Toca 511 and 5-FC treatment** BALB/c mice received Toca 511 pre-transduced CT26 cells intracranially and were treated with 5-FC (500 mg/kg, IP, BID) or PBS. Treatments started at day 10 post cell inoculation and were for 7 days on and 7 days off for one cycle. Bone marrow was collected for flow cytometric analysis 14 days post cell implantation. Myeloid cell populations (Cd11b<sup>+</sup>Gr-1<sup>+</sup> Ly6C<sup>+</sup>) were detected from PBS and 5-FC treatment groups. Data are depicted as mean +/- SEM. \*Statistical significance was defined as  $P < .05$ .



**SUPPLEMENTARY TABLES:**

**Table S1. Body weights of Toca 511 pre-transduced CT26-Luc tumor-bearing B6C3F1 mice that received 5-FC cycles**

Summary of the body weights from Fig. 1

| <b>Summary of Body Weights (Gr)</b> |               |                          |                            |                     |
|-------------------------------------|---------------|--------------------------|----------------------------|---------------------|
| <b>Period</b>                       | <b>Group:</b> | <b>CT26-Toca511 +PBS</b> | <b>CT26-Toca511 + 5-FC</b> | <b>Naïve + 5-FC</b> |
| Day 14                              | N             | 14                       | 14                         | 1                   |
|                                     | Mean          | 19.24±1.04               | 19.01±1.63                 | 17.3±0              |
| Day 21                              | N             | 12                       | 13                         | 1                   |
|                                     | Mean          | 19.58±1.22               | 18.5±2.53                  | 17.98±0             |
| Day 28                              | N             | 11                       | 10                         | 1                   |
|                                     | Mean          | 20.46±1.7                | 18.02±2.42                 | 18.77±0             |
| Day 35                              | N             | 2                        | 8                          | 1                   |
|                                     | Mean          | 19.8±0.3                 | 17.73±2.74                 | 18.03±0             |
| Day 42                              | N             | 1                        | 8                          | 1                   |
|                                     | Mean          | 19.66±0                  | 17.78±3.28                 | 18.17±0             |
| Day 49                              | N             | 1                        | 8                          | 1                   |
|                                     | Mean          | 22.47±0                  | 17.58±1.83                 | 19.24±0             |
| Day 63                              | N             | N/A                      | 6                          | 1                   |
|                                     | Mean          |                          | 18.91±1.24                 | 19.61±0             |
| Day 70                              | N             | N/A                      | 6                          | 1                   |
|                                     | Mean          |                          | 20.14±1.37                 | 19.59±0             |
| Day 81                              | N             | N/A                      | 6                          | 1                   |
|                                     | Mean          |                          | 19.77±1.1                  | 20.44±0             |
| Day 91                              | N             | N/A                      | 6                          | 1                   |
|                                     | Mean          |                          | 20.39±1.08                 | 19.8±0              |
| Day 102                             | N             | N/A                      | 6                          | 1                   |
|                                     | Mean          |                          | 20.84±1.5                  | 19.82±0             |
| Day 112                             | N             | N/A                      | 6                          | 1                   |
|                                     | Mean          |                          | 21.8±1.6                   | 21.1±0              |
| Day 119                             | N             | N/A                      | 6                          | 1                   |
|                                     | Mean          |                          | 22.86±1.81                 | 22.13±0             |
